# Supplementary material for: Erythritol Ameliorates Small Intestinal Inflammation Induced by High-Fat Diets and Improves Glucose Tolerance
Source: MDPI journal article supplement (doi:10.3390/ijms22115558), 2021-05-24
Supplement: s1 [file s1]

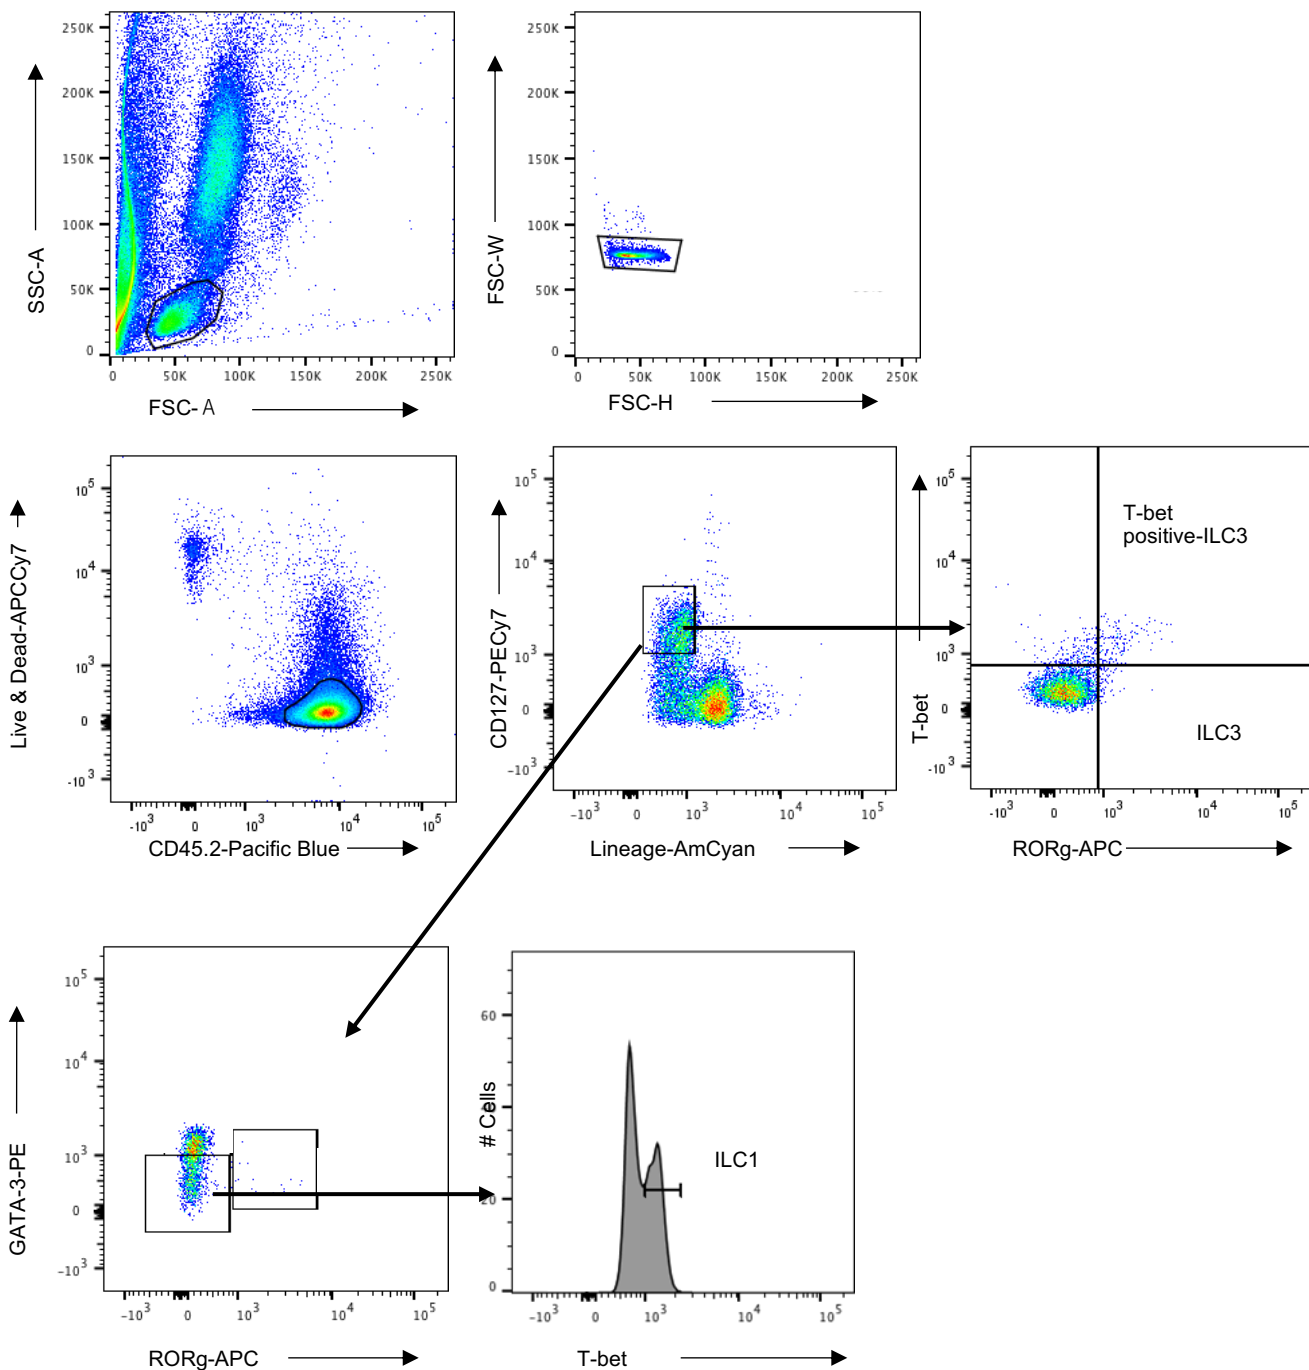

**Supplementary Figure 1.** Strategy for innate lymphoid cells (ILCs)

Representative flow cytometry plots of liver CD45<sup>+</sup> Live & Dead- Lin- CD127<sup>+</sup> RORg- GATA-3- T-bet<sup>+</sup> ILC1s, CD45<sup>+</sup> Live & Dead- Lin- CD127<sup>+</sup> RORg<sup>+</sup> T-bet- ILC3s and CD45<sup>+</sup> Live & Dead- Lin- CD127<sup>+</sup> RORg<sup>+</sup> T-bet<sup>+</sup> T-bet positive ILC3s in each group at 20-weeks of age.

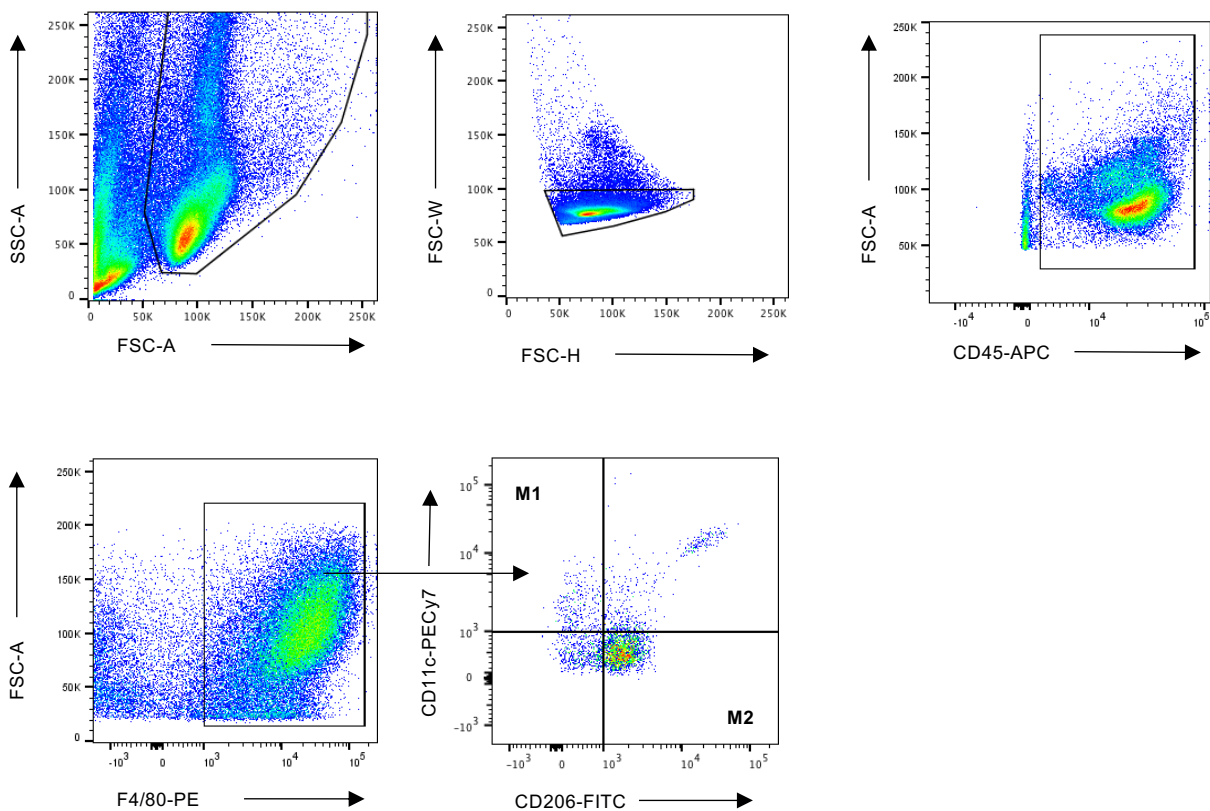

## Supplementary Figure 2. Strategy for macrophages

Representative flow cytometry plots of WAT CD45+ F4/80+ CD206- CD11c+ M1 macrophages and CD45+ F4/80+ CD206+ CD11c- M2 macrophages in each group at 20 weeks of age.
