# Supplementary material for: Erythritol Ameliorates Small Intestinal Inflammation Induced by High-Fat Diets and Improves Glucose Tolerance
Source: MDPI journal article supplement (doi:10.3390/ijms22115558), 2021-05-24
Supplement: s1 [file s1]

| Antibody                          | Clone    | Vendor     | Dilution |
|-----------------------------------|----------|------------|----------|
| biotin-CD3e                       | 145-2C11 | Biolegend  | 1:200    |
| biotin-CD45R/B220                 | RA3-6B2  | Biolegend  | 1:200    |
| biotin-Gr-1                       | RB6-8C5  | Biolegend  | 1:200    |
| biotin-CD11c                      | N418     | Biolegend  | 1:200    |
| biotin-CD11b                      | M1/70    | Biolegend  | 1:200    |
| biotin-Ter119                     | TER-119  | Biolegend  | 1:200    |
| biotin-FcεRIα                     | MAR-1    | Biolegend  | 1:200    |
| FITC-streptavidin                 | -        | Biolegend  | 1:500    |
| PE-Cy7-CD127                      | A7R34    | Biolegend  | 1:100    |
| Pacific Blue-CD45                 | 30-F11   | Biolegend  | 1:100    |
| PE-GATA-3                         | TWAI     | Invitrogen | 1:50     |
| APC-RORγ                          | AFKJS-9  | Invitrogen | 1:50     |
| eFluor 780- Fixable Viability Dye | -        | Invitrogen | 1:400    |
| APC-CD45.2                        | 104      | Invitrogen | 1:50     |
| PE-F4/80                          | BM8      | Invitrogen | 1:50     |
| APC-Cy7-CD11b                     | M1/70    | Biolegend  | 1:50     |
| FITC-CD206                        | MR5D3    | Invitrogen | 1:50     |
| PE-Cy7-CD11c                      | N418     | Invitrogen | 1:50     |
